# Supplementary material for: Overexpression of microRNAs miR-25-3p, miR-185-5p and miR-132-3p in Late Onset Fetal Growth Restriction, Validation of Results and Study of the Biochemical Pathways Involved
Source: MDPI journal article supplement (doi:10.3390/ijms23010293), 2021-12-28
Supplement: s1 [file s1]

### Synergistically working miRNAs

Cooperatively working miRNAs have only fairly recently been able to be computed (Schmitz et al, 2014). Traditional functional analysis pipelines such as EnrichR and ClueGO do not consider these targets, yet (Chen et al, 2003, Bindea et al, 2009).

To improve functional interpretation of deregulated miRNAs, predicted gene targets were included for consideration. Only genes targeted by at least two synergistically working miRNA pairs were considered. The lower free energy and energy gain, the more likely these miRNAs will pair triplexes with their target.

**Table S1.** Predicted miRNA pair - gene triplexes. MiRNA that have the ability to repress a gene in a synergistic manner. Free energy and energy gain of said triplex formation indicate both likelihood and efficacy of triplex formation.

| Gene  | miRNA1      | miRNA2      | Free Energy [kcal/mol] | Energy gain [kcal/mol] | Pattern                     |
|-------|-------------|-------------|------------------------|------------------------|-----------------------------|
| SIX2  | hsa-miR-185 | hsa-miR-185 | -35.26                 | -16.88                 | Canonical triplex           |
|       | hsa-miR-185 | hsa-miR-185 | -34.16                 | -15.98                 | Canonical triplex           |
| MEIS1 | hsa-miR-25  | hsa-miR-25  | -23.16                 | -9.08                  | target self-complementarity |
|       | hsa-miR-25  | hsa-miR-132 | -22.26                 | -9.78                  | Canonical triplex           |
| SOX13 | hsa-miR-132 | hsa-miR-185 | -34.06                 | -15.18                 | Canonical triplex           |
|       | hsa-miR-185 | hsa-miR-185 | -38.56                 | -18.08                 | Canonical triplex           |
| CNOT7 | hsa-miR-25  | hsa-miR-132 | -24.46                 | -6.28                  | miRNA duplex                |
|       | hsa-miR-132 | hsa-miR-185 | -28.26                 | -11.48                 | Canonical triplex           |
| XYLB  | hsa-miR-185 | hsa-miR-185 | -33.76                 | -15.28                 | miRNA self-complementarity  |
|       | hsa-miR-185 | hsa-miR-185 | -31.46                 | -15.28                 | miRNA self-complementarity  |

### Regulatory elements of the FGR phenotype

Functional analysis of the miRNA - target gene - transcription factor regulatory network revealed a myriad of overrepresented biological process GO terms. These were selected for processes known to be deregulated in FGR. To further filter for regulatory elements, only genes falling into more than one GO term were

considered (Table S2). These elements were then used to filter the existing miRNA - target gene - transcription factor network. As seen in Figure 4C (main manuscript) these targets show high interconnectedness indicating a regulatory role (<https://www.frontiersin.org/articles/10.3389/fgene.2019.01120/full>) considering the selected biological processes (heart process, response to decreased oxygen levels, neuron death, regulation of lipid biosynthetic process).

Table S2. Functional analysis of the miRNA - target gene - transcription factor regulatory network overrepresented biological process GO terms.

| Gene   | No° processes | Processes                                                                                   | miRNA          | Degree |
|--------|---------------|---------------------------------------------------------------------------------------------|----------------|--------|
| SLC9A1 | 3             | Heart process, response to decreased oxygen levels, neuron death                            | hsa-miR-185-5p | 2      |
| REST   | 3             | Response to decreased oxygen levels, regulation of lipid biosynthetic process, neuron death | hsa-miR-132-3p | 4      |
| SIRT1  | 3             | response to decreased oxygen levels, regulation of lipid biosynthetic process, neuron death | hsa-miR-132-3p | 22     |
| CREB1  | 3             | Response to decreased oxygen, regulation of lipid biosynthetic process, neuron death        | hsa-miR-132-3p | 11     |
| EGR1   | 3             | Response to decreased oxygen, regulation of lipid biosynthetic process, neuron death        | hsa-miR-132-3p | 8      |
| FBXW7  | 2             | regulation of lipid biosynthetic process, neuron death                                      | hsa-miR-25-3p  | 13     |
| SLC8A1 | 2             | Response to decreased oxygen levels, heart process                                          | hsa-miR-185-5p | 1      |
| RHOA   | 2             | response to decreased oxygen levels, neuron death                                           | hsa-miR-185-5p | 5      |
| CCNA2  | 2             | Response to decreased oxygen levels, regulation of lipid biosynthetic process               | hsa-miR-132-3p | 14     |
| SREBF1 | 2             | Heart process, regulation of lipid biosynthetic process                                     | hsa-miR-185-5p | 11     |
| CDC42  | 2             | Heart process, neuron death                                                                 | hsa-miR-185-5p | 6      |

|       |   |                                                    |                |    |
|-------|---|----------------------------------------------------|----------------|----|
| EPAS1 | 2 | Response to decreased oxygen levels, heart process | hsa-miR-185-5p | 8  |
| MDM2  | 2 | Response to decreased oxygen levels, heart process | hsa-miR-25-3p  | 23 |
| ATF4  | 2 | Response to decreased oxygen levels, neuron death  | hsa-miR-25-3p  | 8  |
| TP53  | 2 | Response to decreased oxygen levels, neuron death  | hsa-miR-25-3p  | 33 |
